# Supplementary material
Source: publisher site journal article supplement (https://www.dovepress.com/article/306880)
Supplement: Supplementary file 1 [file get_supplementary_file.php]

# Appendix1. The questionnaire used in the study.

| Question                                      |                                                                                                                                                                     | Response |
|-----------------------------------------------|---------------------------------------------------------------------------------------------------------------------------------------------------------------------|----------|
| <b>Personal data</b>                          |                                                                                                                                                                     |          |
| Gender                                        | Male /Female                                                                                                                                                        |          |
| Age (Years)                                   | >25,26-30,31-40,41-45,46-50, and >50                                                                                                                                |          |
| Occupation                                    | oral maxillofacial surgery, oral medicine, oral pathology, public health, conservative and endodontics, orthodontics, prosthodontics, periodontics, and pedodontics |          |
| Source of information                         | Social media/ Health authorities/ both                                                                                                                              |          |
| Do you have sufficient knowledge on COVID--19 | Yes/No/ Maybe                                                                                                                                                       |          |
| <b>Knowledge</b>                              |                                                                                                                                                                     |          |
| K1                                            | Do you know that COVID-19 is a viral infection?                                                                                                                     | Yes/ No  |
| K2                                            | Do you know that COVID-19is fatal?                                                                                                                                  | Yes/ No  |
| K3                                            | Do you know that COVID-19 is transmitted by close contact with an infected person?                                                                                  | Yes/ No  |
| K4                                            | Do you know that fever, cough, and shortness of breath are symptoms of COVID-19?                                                                                    | Yes/ No  |
| K5                                            | Do you know that the incubation period is COVID-19 is 2 weeks?                                                                                                      | Yes/ No  |
| K6                                            | Do you think the vaccine is available in markets?                                                                                                                   | Yes/ No  |
| K7                                            | Do you think washing hands with soap and water or the use of sanitizer can help in the prevention of COVID-19 transmission?                                         | Yes/ No  |
| K8                                            | Do you think patients with underlying chronic diseases are at a higher risk of COVID-19?                                                                            | Yes/ No  |
| K9                                            | Do you know that the use of N95 can help in avoiding COVID-19?                                                                                                      | Yes/ No  |
| K10                                           | Do you know that dentists are at a higher risk of COVID-19?                                                                                                         | Yes/ No  |
| <b>Perceptions</b>                            |                                                                                                                                                                     |          |
| P1                                            | Are you worried one of your family members may get COVID-19?                                                                                                        | Yes/ No  |
| P2                                            | Transmission of COVID-19 can be prevented by using standard and isolation precautions given by WHO, CDC, ADA, etc?                                                  | Yes/ No  |
| P3                                            | The prevalence of COVID-19 can be reduced by the active participation of health care workers in the hospital infection control program?                             | Yes/ No  |
| P4                                            | If a COVID-19vaccine is available, would you have it?                                                                                                               | Yes/ No  |
| P5                                            | Do you think dental treatment should be provided to patients with COVID-19 positive?                                                                                | Yes/ No  |
| P6                                            | Dentists must avail themselves of all information about the COVID-19?                                                                                               | Yes/ No  |
| P7                                            | Is the available information about COVID-19 in your professional society sufficient?                                                                                | Yes/ No  |
| P8                                            | Are the government institutions able to control the COVID-19 pandemic?                                                                                              | Yes/ No  |
